# Supplementary material for: Induction of the Stringent Response Underlies the Antimicrobial Action of Aliphatic Isothiocyanates
Source: Front Microbiol. 2021 Jan 14;11:591802. doi: 10.3389/fmicb.2020.591802 (PMC7874123; doi:10.3389/fmicb.2020.591802)
Supplement: Supplementary file 2 [file Table_2.XLSX]

## Sheet: peptide analysis
component	WT vs. WT+ITC1	relA vs. relA+ITC1	diference	Molecular weight [g/mol]:	Extinction coefficient [M-1cm-1]:	Iso-electric point [pH]:	Net charge at pH 7:	Estimated solubility (1-Good water solubility; 0-Poor water solubility) RANKS	Hydrophilicity: Very good+2; Good+1; Normal 0; Poor-1; Very poor-2; RANKS
Leu-Asp	-147	0	147	246.26	0	0.88	-1	1	1		NUMERIC DATA SOURCE:
Asn-Glu	-139	-85	54	261.23	0	1	-1	1	1		https://pepcalc.com/:
His-Asp	-128	0	128	270.24	0	4.87	-0.9	1	1		-Molecular weight [g/mol];
Ser-His	-126	-109	17	242.23	0	7.54	0.1	1	-1		-Extinction coefficient [M-1cm-1];
Pro-Ser	-125	-93	32	202.21	0	4.17	0	1	1		-Iso-electric point [pH];
Trp-Asp	-120	0	120	319.31	5690	0.88	-1	1	-1		-Net charge at pH 7;
Arg-Asp	-120	-84	36	289.29	0	6.35	0	1	2		-Estimated solubility
Trp-Glu	-118	0	118	333.34	5690	1	-1	1	-1		https://www.genscript.com/tools/peptide-analyzing-tool?src=google:
His-Ser	-117	0	117	242.23	0	7.56	0.1	1	-1		-Hydrophilicity
Ser-Asn	-117	0	117	219.2	0	3.44	0	1	1
Arg-Ser	-116	-119	-3	261.28	0	10.55	1	1	1
Ser-Asp	-116	0	116	220.18	0	0.88	-1	1	1
Ile-Ser	-116	-95	21	218.25	0	3.73	0	0	-1		CORRELATION ANALYSIS:
Arg-Glu	-115	0	115	303.32	0	6.58	0	1	2
Pro-Gln	-114	0	114	243.26	0	4.15	0	1	1			Pearson correlation (R)				Spearman correlation (Rho = RS)
Pro-Asp	-113	0	113	230.22	0	0.88	-1	1	1		WT	Molecular weight	Extinction coefficient	Iso-electric point	Net charge at pH 7	Estimated solubility	Hydrophilicity
Trp-Arg	-111	-94	17	360.41	5690	10.72	1	1	-1		R or RS	-0.241	0.0446	-0.0489	0.203	-0.50217	-0.3597
Glu-Ser	-110	-86	24	234.21	0	1.01	-1	1	1		p value	0.037263	0.703983	0.682579	0.080682	0	0.00153
Arg-Trp	-109	0	109	360.41	5690	10.55	1	1	-1			SIGNIFICANT	NS	NS	NS	SIGNIFICANT	SIGNIFICANT
Gln-Glu	-108	0	108	275.26	0	1	-1	1	1
His-Glu	-108	0	108	284.27	0	5.1	-0.9	1	1
Phe-Asp	-106	0	106	280.28	0	0.88	-1	1	1		relA	Pearson correlation (R)				Spearman correlation (Rho = RS)
Phe-Glu	-105	0	105	294.3	0	1	-1	1	1		R or RS	0.2234	0.1218	-0.148	-0.155	-0.10102	-0.02779
Ser-Tyr	-105	0	105	268.27	1280	3.39	0	0	-1		p value	0.054026	0.297883	0.20509	0.184233	0.38848	0.81292
Trp-Ser	-103	0	103	291.3	5690	3.61	0	0	-1			NS	NS	NS	NS	NS	NS
Ser-Glu	-101	0	101	234.21	0	1	-1	1	1
Tyr-Glu	-100	0	100	310.3	1280	1	-1	1	1		relA-WT	Pearson correlation (R)				Spearman correlation (Rho = RS)
Trp-Tyr	-100	0	100	367.4	6970	3.51	0	0	-2		R or RS	0.321	0.0367	-0.0488	-0.2508	-0.10102	0.29151
Ile-Asn	-97	0	97	245.28	0	3.72	0	0	-1		p value	0.004985	0.754586	0.682579	0.030528	0.38848	0.01117
Arg-Tyr	-96	0	96	337.37	1280	9.55	1	1	1			SIGNIFICANT	NS	NS	SIGNIFICANT	NS	SIGNIFICANT
Pro-lle	-93	0	93	228.29	0	4.11	0	0	-1
Arg-Arg	-90	0	90	330.39	0	12.1	2	1	2
Glu-Glu	-90	0	90	276.24	0	0.85	-2	1	2		Correlation analysis
Arg-Phe	-88	0	88	321.37	0	10.55	1	1	1		Pearson Correlation Coefficient Calculator
Leu-Glu	-88	0	88	260.29	0	1	-1	1	1		https://www.socscistatistics.com/tests/pearson/default2.aspx
Lys-Pro	-87	0	87	228.29	0	3.82	0	0	-1		P Value from Pearson (R) Calculator
Pro-Asn	-86	0	86	229.23	0	4.16	0	1	1		https://www.socscistatistics.com/pvalues/pearsondistribution.aspx
Pro-Arg	-80	0	80	271.32	0	11.29	1	1	1		Spearman's Rho Calculator
Ala-Ile	-78	0	78	202.25	0	3.72	0	0	-1		https://www.socscistatistics.com/tests/spearman/default2.aspx
Lys-Arg	-73	0	73	287.36	0	10.84	1	1	1
Ala-Tyr	-71	0	71	252.27	1280	3.66	0	0	-1
Ser-Ala	-70	0	70	176.17	0	3.36	0	1	-1
Ala-Gln	0	-96	-96	217.22	0	3.77	0	1	-1
Ser-Leu	0	0	0	176.17	0	3.36	0	1	-1
Ser-Pro	0	-120	-120	202.21	0	3.55	0	1	1
Gly-Ser	0	-91	-91	162.14	0	3.72	0	1	1
Ile-Arg	0	-87	-87	287.36	0	10.85	1	1	1
Ser-Gly	0	-72	-72	162.14	0	3.36	0	1	1
Arg-Ala	0	0	0	245.28	0	10.55	1	1	1
Asp-Gln	0	0	0	243.26	0	4.15	0	1	1
Glu-Asp	0	0	0	244.24	0	1.1	-1	1	1
Lys-Glu	0	0	0	260.29	0	1	-1	1	1
Ser-Gln	0	0	0	233.22	0	3.43	0	1	1
Leu-Trp	0	-73	-73	317.38	5690	3.6	0	0	-2
Lys-Trp	0	0	0	317.38	5690	3.6	0	0	-2
Phe-Trp	0	0	0	351.4	5690	3.36	0	0	-2
Trp-Lys	0	0	0	317.38	5690	3.51	0	0	-2
Trp-Trp	0	0	0	390.43	11380	3.48	0	0	-2
Ala-Gly	0	-103	-103	146.14	0	3.69	0	0	-1
Ser-Phe	0	-102	-102	252.27	0	3.43	0	0	-1
Ile-Gln	0	-84	-84	259.3	0	3.71	0	0	-1
Ile-Ala	0	-79	-79	202.25	0	3.63	0	0	-1
Asp-Leu	0	0	0	186.21	0	4.07	0	0	-1
Gly-Gly-Leu	0	0	0	203.2	0	3.63	0	0	-1
Met-Pro	0	0	0	246.33	0	3.57	0	0	-1
Phe-Ala	0	0	0	236.27	0	3.38	0	0	-1
Phe-Gly-Gly	0	0	0	279.29	0	3.37	0	0	-1
Phe-Ser	0	0	0	252.27	0	3.48	0	0	-1
Pro-Leu	0	0	0	186.21	0	4.07	0	0	-1
Pro-Lys	0	0	0	228.29	0	4.08	0	0	-1
Pro-Phe	0	0	0	262.3	0	4.15	0	0	-1
Pro-Trp	0	0	0	301.34	5690	4.04	0	0	-1
Tyr-Gln	0	0	0	309.32	1280	3.41	0	0	-1
Gly-Asp	0	0	0	172.18	0	3.82	0	0	0
Gly-Gly-Gly	0	0	0	189.17	0	3.62	0	0	0
												By normal standards, the association between the two variables would be considered statistically significant.
